# Supplementary material
Source: Springer Nature journal article supplement (https://www.springermedizin.de/resource/supplementary/12982_2008_63_MOESM4_ESM.pdf/9604374)
Supplement: MOESM4 [file 9604374]

Spanish / Español

Comentario

## **Citaciones de publicaciones revisadas por pares escritas en otros idiomas que el inglés - algunos ejemplos chinos.**

Autor: Isaac Chun-Hai Fung

Resumen

Hoy en día son pocos los artículos publicados en revistas en inglés que citan material escrito en otros idiomas. Sin embargo, conforme los epidemiólogos se van dando cuenta de la disponibilidad y accesibilidad de información y de datos en la literatura científica en otros idiomas, se presenta la pregunta siguiente: ¿es posible citar estos materiales en revistas en inglés? Y en caso de serlo, el cómo hacerlo se ha convertido en un problema cada vez más importante. Reuniendo percepciones del autor, que resultan de su familiaridad con la literatura en epidemiología en chino y en inglés, con resultados de una encuesta acerca del uso de citas de materiales escritos en idiomas otros que el inglés por una muestra de revistas de epidemiología y salud pública, este comentario analiza las diferentes formas en las que los autores citan artículos en otros idiomas en diferentes revistas en inglés y los distintos métodos empleados por las revistas para manejar caracteres que no son

latinos (Ej. Transliteración). Este comentario le será útil tanto a epidemiólogos como a editores.

*Traducido al español por Annick Bórquez*
